# Supplementary material for: Elevation of androgen receptor promotes prostate cancer metastasis by induction of epithelial‐mesenchymal transition and reduction of KAT5
Source: PubMed Central journal article supplement — Cancer Sci. 2018 Sep 25;109(11):3564–74. doi: 10.1111/cas.13776 (PMC6215884; doi:10.1111/cas.13776), 2018-09-25
Supplement: CAS-109-3564-s001.pdf [file CAS-109-3564-s001.pdf]

**Figure S1**

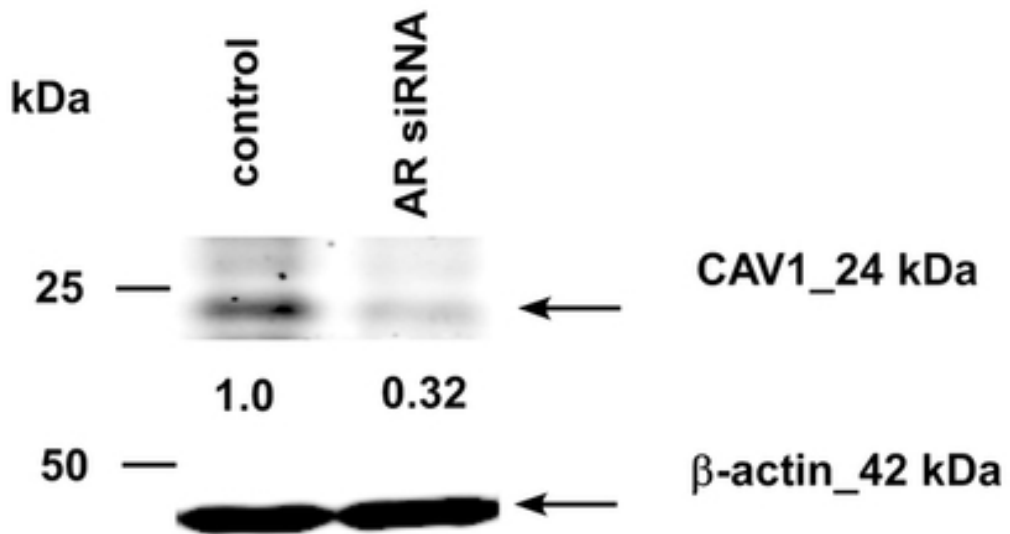

**Figure S1. Protein expression level of CAV-1 in C4-2B cells with AR siRNA knockdown.** Lysate from C4-2B cells with control scramble or KAT5 siRNA knockdown was examined for protein expression level of KAT5 using Western blotting.  $\beta$ -actin was used as loading control.
